# Supplementary material
Source: publisher site journal article supplement (https://static.cambridge.org/content/id/urn:cambridge.org:id:article:S1751731120000440/resource/name/S1751731120000440supp001.doc)
Supplement: Supplementary file 1 [file S1751731120000440supp001.doc]

***animal* journal**

**Effect of dietary inclusion of 1% or 3% of native chicory inulin on the large intestinal mucosa proteome of growing pigs**

A. Herosimczyk, A. Lepczyński, M. Ożgo, A. Tuśnio, M. Taciak and M. Barszcz

*Supplementary Material S1***.** The detailed description of 2-D gel image analysis.

1. The study was performed on piglets fed with control (C) diet or diets supplemented with 1% (T1) or 3% (T2) of native inulin for 40 days. 50-day-old piglets were sacrificed and the following tissue fragments were collected: cecum, proximal and distal colon. Proteins were resolved using two-dimensional electrophoresis. Resulting gel images were captured using a GS-800™ Calibrated Densitometer (Bio-Rad). 2-D images were analysed with the aid of PDQuest Analysis software version 8.0.1 Advanced (Bio-Rad, Hercules, CA, USA). Three independent PDQuest analyses were performed for the three tissue fragments i.e. cecum, proximal and distal colon. Each 2-D gel analysis, created for the specific tissue fragment, consisted of 48 gels (three experimental groups – C, T1 and T2, each contained 8 samples performed in duplicate). All gel images from each experimental group were aligned and a match set was created. A match set comprised each spot present on any of the gels included in the specific experimental group. Thus, for each group (C, T1 and T2) an individual match set was created. Next, all match sets from three different groups were merged and used as a master gel. Master gel was then used for automatic spot detection and spot boundaries identification. Those data were exported from the master gel to all individual gels, thus eliminating variability in spot quantification resulting from the spot shape. Automatic spot detection was used with an appropriate selection of the faintest, the smallest and the largest cluster of spots, streaks and background substraction. Next, images were manually edited to confirm proper spot detection and matching. After manual comparison of the gels, all spots displaying poor quality (too faint) or artefacts (spots that are not really spots but speckles or saturated spots), or spots that were present only on two or three gels were excluded from the experiment. This allowed us to detect approximately 470-520 spots on each 2-D gel. Normalization of the spots was performed based on the local regression model (LOESS) that corrects for any possible differences in staining efficiency occurring for different concentration levels in the resolved protein sample. Every spot on each gel was quantified, experimental group-specific averages for each soot were determined and finally statistical analysis was performed to define proteins that differs between the control and treated groups. For the statistical analysis, a paired two-tailed Student’s t-test (C vs. T1 and C vs. T2) was used to determine differences in the average protein abundance between the gels and *P* < 0.05 was considered significant. Next, the spots were ranked by a fold-change with a cutoff of 2. Protein spots significantly (*P* < 0.01 or *P* < 0.05) increased or decreased (more than 2-fold) were considered as differentially expressed and presented as a final result of the experiment. The average ratio values are presented in Table 1 (C vs. T1) and 2 (C vs. T2) for the cecal proteins. The average values for the proximal colonic proteins are given in Table 3 (C vs. T1) and 4 (C vs. T2). In turn, values characteristic for the distal colonic proteins are shown in Table 5 (C vs. T1) and 6 (C vs. T2). To measure the variability within the group, the coefficients of variation (CV) were calculated. Based on the standard 2-D markers, the experimental isoelectric point and molecular weight (kDa) values were computed for each identified protein spot.

*Supplementary Material S2***.** Description of statistical methods used to analyse productive traits values and differences in protein expression patterns.

1. Productive traits were analysed by one-way analysis of variance according to the following model:

yij = μ + αi +eij,

where: yij – individual observation; μ – overall mean; αi – effect of inulin level (i = 1, 3); and eij – residual error.

Differences between groups were determined by Tukey’s test using Statgraphics Centurion XVI version 16.1.03 statistical package (StatPoint Technologies, Inc., Warrenton, VA, USA). The effects were considered significant at P ≤ 0.05.

1. Statistical significance of changes in abundance between sample groups (C vs. T1 and C vs. T2) was calculated using a paired two-tailed Student’s t-test

and *P* < 0.05 was considered significant. All statistical analyses were performed using the PDQuest software (Bio-Rad) according to the following model:

where: t – individual observation; X1 – overall mean of the control group; X2 – overall mean of the T1 or T2 group; n1 – number of gels representing the control group, n2 – number of gels representing the T1 or T2 group; s1 – standard error of the differences of the means of the control group; and s2 – standard error of the differences of the means of the T1 or T2 group.

***Supplementary Table S1*** *Composition of control and experimental diets fed to pigs*

| Ingredients (%) | | Diet | | |
| --- | --- | --- | --- | --- |
| Control | 1% of inulin | 3% of inulin |
| Wheat | 46.84 | | 46.84 | 46.84 |
| Barley | 20 | | 20 | 20 |
| Corn starch | 3 | | 2 | - |
| Full-fat soybean | 5.90 | | 5.90 | 5.90 |
| Whey | 9.70 | | 9.70 | 9.70 |
| Fish meal | 4.00 | | 4.00 | 4.00 |
| Spray-dried blood plasma | 4.00 | | 4.00 | 4.00 |
| Soybean oil | 3.40 | | 3.40 | 3.40 |
| Calcium formate | 0.30 | | 0.30 | 0.30 |
| Limestone | 0.50 | | 0.50 | 0.50 |
| Dicalcium phosphate | 0.60 | | 0.60 | 0.60 |
| Sodium chloride | 0.07 | | 0.07 | 0.07 |
| L-lysine | 0.61 | | 0.61 | 0.61 |
| DL-methionine | 0.23 | | 0.23 | 0.23 |
| L-threonine | 0.26 | | 0.26 | 0.26 |
| L-tryptophan | 0.09 | | 0.09 | 0.09 |
| Mineral-vitamin premix1 | 0.40 | | 0.40 | 0.40 |
| Aroma | 0.10 | | 0.10 | 0.10 |
| Native chicory inulin2 | - | | 1 | 3 |

DP = degree of polymerisation

1 Premix composition, per kg: vitamin A 600 000 IU, vitamin D3, 60 000 IU, vitamin E 3000 mg, vitamin K3 120 mg, vitamin B1 120 mg, vitamin B2 240 mg, vitamin B6 240 mg, nicotinic acid 1600 mg, pantothenic acid 800 mg, folic acid 160 mg, biotin 10 mg, vitamin B12 1.6 mg, choline chloride 12 g, Mg 3.2 g, Fe 6 g, Zn 5.6 g, Mn 2.4 g, Cu 6.4 g, I 40 mg, Se 16 mg, Co 16 mg.

2 Inulin (Inulin Orafti®GR, BENEO GmbH, Mannheim, Germany) containing approximately 92% of inulin with DP ≥ 10 and 8% of other carbohydrates (glucose, fructose and sucrose)

***Supplementary Table S2*** *Nutrient contents of control and experimental diets fed to pigs*

| Nutrients (% dry matter) | | Diet | | |
| --- | --- | --- | --- | --- |
| Control | 1% of inulin | 3% of inulin |
| Dry matter | 90.03 | | 90.15 | 90.13 |
| Crude ash | 4.54 | | 4.54 | 4.53 |
| Crude protein | 20.05 | | 20.04 | 20.03 |
| Ether extract | 6.04 | | 6.04 | 6.03 |
| Crude fiber | 1.52 | | 1.52 | 1.51 |
| Fructan | 1.00 | | 1.52 | 3.11 |
| ME (MJ/kg) | 14.30 | | 14.30 | 14.30 |

ME = metabolizable energy

***Supplementary Table S3*** *Mean data on body weights and gains of pigs fed a control or experimental diet1*

| Parameters | Diet | | | | | SED | | *P-*value | |
| --- | --- | --- | --- | --- | --- | --- | --- | --- | --- |
| Control | 1% of inulin | | 3% of inulin | |
| Body weight at weaning (kg) | 8.00 | | 7.30 | | 7.50 | | 0.29 | | 0.6576 |
| Final body weight (kg) | 17.90 | | 16.70 | | 17.50 | | 0.50 | | 0.6222 |
| Body weight gain (kg) | 9.90 | | 9.40 | | 10.00 | | 0.35 | | 0.7339 |

SED = standard error of the differences of the means.

1This data were previously published in the paper of Herosimczyk et al. (2017)
